# Supplementary material for: Hearing loss and cognitive decline in the general population: a prospective cohort study
Source: J Neurol. 2020 Sep 10;268(3):860–71. doi: 10.1007/s00415-020-10208-8 (PMC7914236; doi:10.1007/s00415-020-10208-8)
Supplement: Supplementary file 1 — Supplementary file1 (PDF 185 kb) [file 415_2020_10208_MOESM1_ESM.pdf]

**SUPPLEMENTARY FILE*****SUPPLEMENTARY METHODS****Clarification attrition rate between baseline- and follow-up measurement*

Supplementary figure 2 shows a schematic overview of the Rotterdam Study. The Rotterdam Study consists of four different cohorts: RS-I (from 1990 onwards), RS-II (from 2000 onwards), RS-III (from 2006 onwards), and RS-IV (from 2007 onwards). As hearing assessment was incorporated into the core study protocol from 2011 onwards, data on baseline hearing function has been collected in RS-I (halfway through visit 5), RS-II (visit 3), and RS-III (visit 2). Data of RS-IV is not available yet and is thus not included in the current study. Of the cohorts with available baseline data, RS-I (visit 6) and RS-II (visit 4) have had a follow-up assessment. RS-III, which contains 2,504 participants with a baseline hearing- and cognitive assessment, has not been re-invited to the study center yet for follow-up examinations.

**SUPPLEMENTARY DATA****Supplementary table 1. Demographic differences**

| <b>Baseline characteristics</b>              | <b>Participants with only baseline cognitive measurement</b> | <b>Participants with both baseline and FU cognitive measurements</b> | <b>Significance</b> |
|----------------------------------------------|--------------------------------------------------------------|----------------------------------------------------------------------|---------------------|
| Age, years                                   | 63.0 (6.6)                                                   | 71.9 (4.4)                                                           | **                  |
| Female, %                                    | 57.0                                                         | 53.7                                                                 | n.s.                |
| Education level, %                           |                                                              |                                                                      |                     |
| Primary                                      | 8.4                                                          | 4.2                                                                  | **                  |
| Lower                                        | 35.9                                                         | 41.6                                                                 | **                  |
| Intermediate vocational                      | 28.5                                                         | 32.8                                                                 | **                  |
| Higher                                       | 27.2                                                         | 21.9                                                                 | **                  |
| Alcohol consumption, gram                    | 8.1 (1.4 – 20.0)                                             | 6.9 (1.2 – 17.0)                                                     | *                   |
| Smoking, %                                   |                                                              |                                                                      |                     |
| Never                                        | 31.8                                                         | 31.6                                                                 | n.s.                |
| Past                                         | 18.8                                                         | 11.8                                                                 | **                  |
| Current                                      | 49.4                                                         | 56.6                                                                 | **                  |
| Systolic blood pressure, mmHg                | 135.8 (19.6)                                                 | 151.0 (20.9)                                                         | **                  |
| Diastolic blood pressure, mmHg               | 82.1 (10.9)                                                  | 86.3 (11.4)                                                          | **                  |
| Use of blood pressure lowering medication, % | 37.6                                                         | 49.4                                                                 | **                  |

Values are mean (standard deviation) for continuous variables or median (interquartile range) when indicated (<sup>a</sup>), percentages for dichotomous variables. T-test were used for normally distributed variables,  $\chi^2$ -test for dichotomous variables, and Mann-Whitney U-Test for non-normally distributed variables to see whether characteristics were significantly different ( $p < 0.05$ ) between participants with only a baseline cognitive assessment and participants with a second cognitive assessment at follow-up. Statistically significant difference between groups: \*  $p < 0.05$ . \*\*  $p < 0.01$ .

**Supplementary table 2. The additional change in cognitive score per year attributed to hearing loss based on the longitudinal analysis (slope differences)**

| <i>Hearing loss</i>                                           |         | <b>Mini-Mental<br/>State<br/>Examination<br/>score</b> | <b>Stroop Test<br/>interference score</b> | <b>Word Fluency<br/>Test score</b> | <b>Letter Digit<br/>Substitution Test score</b> | <b>Word Learning<br/>Test delayed recall</b> | <b>Purdue Pegboard<br/>Test sum score</b> |
|---------------------------------------------------------------|---------|--------------------------------------------------------|-------------------------------------------|------------------------------------|-------------------------------------------------|----------------------------------------------|-------------------------------------------|
|                                                               |         | Difference (95%<br>CI)                                 | Difference (95% CI)                       | Difference (95%<br>CI)             | Difference (95% CI)                             | Difference (95% CI)                          | Difference (95% CI)                       |
| <b><i>Hearing threshold per 10 dB increase</i></b>            |         |                                                        |                                           |                                    |                                                 |                                              |                                           |
| <i>All frequencies</i>                                        | Model 1 | -0.01 (-0.04, 0.02)                                    | -0.12 (-0.42, 0.18)                       | -0.02 (-0.11, 0.08)                | 0.02 (-0.05, 0.08)                              | -0.03 (-0.07, 0.01)                          | 0.01 (-0.05, 0.07)                        |
|                                                               | Model 2 | 0.00 (-0.03, 0.03)                                     | 0.09 (-0.21, 0.41)                        | 0.02 (-0.08, 0.12)                 | 0.05 (-0.02, 0.12)                              | -0.01 (-0.05, 0.03)                          | 0.03 (-0.04, 0.09)                        |
| <i>Speech frequencies</i>                                     | Model 1 | -0.02 (-0.05, 0.01)                                    | -0.12 (-0.41, 0.18)                       | -0.03 (-0.12, 0.07)                | 0.00 (-0.06, 0.07)                              | -0.03 (-0.07, 0.01)                          | -0.01 (-0.07, 0.05)                       |
|                                                               | Model 2 | -0.01 (-0.04, 0.02)                                    | 0.07 (-0.24, 0.37)                        | 0.00 (-0.10, 0.10)                 | 0.03 (-0.04, 0.10)                              | -0.01 (-0.05, 0.03)                          | 0.00 (-0.06, 0.07)                        |
| <b><i>Speech understanding in noise per 1 dB increase</i></b> |         |                                                        |                                           |                                    |                                                 |                                              |                                           |
| <i>Signal-to-noise<br/>ratio</i>                              | Model 1 | -0.01 (-0.02, 0.00)                                    | -0.06 (-0.13, 0.02)                       | 0.00 (-0.02, 0.01)                 | 0.00 (-0.01, 0.02)                              | 0.00 (-0.01, 0.01)                           | 0.00 (0.00, 0.01)                         |
|                                                               | Model 2 | -0.01 (-0.02, 0.00)                                    | -0.02 (-0.09, 0.06)                       | 0.00 (-0.02, 0.02)                 | 0.00 (-0.01, 0.02)                              | 0.00 (-0.01, 0.01)                           | 0.00 (0.00, 0.01)                         |

Difference: represents the additional change in cognitive score per year increase in follow-up time per 10 dB increase in hearing threshold as measured with pure-tone audiometry or the additional change in cognitive score per year increase in follow-up time per 1 dB increase in speech reception threshold as measured with the digits-in-noise test. All frequencies is the average of: 0.25, 0.50, 1, 2, 4, and 8 kHz. Speech frequencies is the average of: 0.5, 1, 2, and 4 kHz. The amount of hearing loss is expressed in dB, i.e. a higher dB value reflects more hearing loss. CI: confidence interval. dB: decibel. Model 1: adjusted for age, sex, education, alcohol consumption, smoking, diastolic and systolic blood pressure, and use of blood pressure lowering medication. Model 2: additionally adjusted for the interaction between age and follow-up time. Analyses for speech understanding were further adjusted for hearing thresholds as measured with pure-tone audiometry. Statistically significant effect estimates ( $p < 0.05$ ) are indicated in **bold**.

**Supplementary table 3. The longitudinal association between hearing loss and cognitive decline stratified on sex**

|                             |                              | Mini-Mental State Examination score | Stroop Test interference score | Word Fluency Test score | Letter Digit Substitution Test score | Word Learning Test delayed recall | Purdue Pegboard Test sum score |
|-----------------------------|------------------------------|-------------------------------------|--------------------------------|-------------------------|--------------------------------------|-----------------------------------|--------------------------------|
|                             |                              | Difference (95% CI)                 | Difference (95% CI)            | Difference (95% CI)     | Difference (95% CI)                  | Difference (95% CI)               | Difference (95% CI)            |
| <b>Male</b>                 |                              |                                     |                                |                         |                                      |                                   |                                |
| <i>Hearing threshold</i>    | <i>All frequencies</i>       | -0.01 (-0.09, 0.06)                 | -0.01 (-0.37, 0.35)            | 0.02 (-0.14, 0.17)      | 0.08 (-0.03, 0.19)                   | 0.00 (-0.06, 0.06)                | -0.03 (-0.13, 0.06)            |
|                             | <i>Speech frequencies</i>    | -0.04 (-0.11, 0.03)                 | -0.08 (-0.43, 0.27)            | -0.00 (-0.16, 0.15)     | 0.06 (-0.04, 0.16)                   | 0.00 (-0.06, 0.06)                | -0.06 (-0.15, 0.03)            |
| <i>Speech understanding</i> | <i>Signal-to-noise ratio</i> | -0.01 (-0.02, 0.01)                 | -0.05 (-0.17, 0.07)            | 0.00 (-0.03, 0.03)      | 0.02 (-0.01, 0.05)                   | 0.00 (-0.02, 0.02)                | 0.00 (-0.01, 0.01)             |
| <b>Female</b>               |                              |                                     |                                |                         |                                      |                                   |                                |
| <i>Hearing threshold</i>    | <i>All frequencies</i>       | -0.04 (-0.09, 0.02)                 | 0.18 (-0.22, 0.59)             | 0.04 (-0.09, 0.17)      | 0.02 (-0.08, 0.12)                   | -0.02 (-0.07, 0.04)               | <b>0.09 (0.00, 0.18)</b>       |
|                             | <i>Speech frequencies</i>    | -0.05 (-0.10, 0.01)                 | 0.13 (-0.28, 0.53)             | 0.02 (-0.11, 0.15)      | 0.00 (-0.10, 0.10)                   | -0.03 (-0.08, 0.02)               | 0.06 (-0.02, 0.15)             |
| <i>Speech understanding</i> | <i>Signal-to-noise ratio</i> | -0.01 (-0.02, 0.00)                 | -0.01 (-0.10, 0.09)            | 0.00 (-0.03, 0.02)      | -0.01 (-0.03, 0.01)                  | 0.00 (-0.01, 0.01)                | 0.00 (0.00, 0.01)              |

Difference: represents the additional change in cognitive score per year increase in follow-up time per 10 dB increase in hearing threshold as measured with pure-tone audiometry or the additional change in cognitive score per year increase in follow-up time per 1 dB increase in speech-reception threshold as measured with the digits-in-noise test. All frequencies is the average of: 0.25, 0.50, 1, 2, 4, and 8 kHz. Speech frequencies is the average of: 0.5, 1, 2, and 4 kHz. The amount of hearing loss is expressed in dB, i.e. a higher dB value reflects more hearing loss. CI: confidence interval. dB: decibel. Adjusted for age, sex, education, alcohol consumption, smoking, diastolic and systolic blood pressure, use of blood pressure lowering medication, and for the interaction between age and follow-up time. Analyses with speech understanding were further adjusted for hearing thresholds as measured with pure-tone audiometry. Statistically significant effect estimates ( $p < 0.05$ ) are indicated in **bold**.

**Supplementary table 4. The longitudinal association between peripheral hearing loss and cognitive decline stratified on midlife versus late-life**

|                                  |                              | Mini-Mental<br>State<br>Examination<br>score | Stroop Test<br>interference score | Word Fluency<br>Test score | Letter Digit<br>Substitution Test<br>score | Word Learning<br>Test delayed recall | Purdue Pegboard<br>Test sum score |
|----------------------------------|------------------------------|----------------------------------------------|-----------------------------------|----------------------------|--------------------------------------------|--------------------------------------|-----------------------------------|
|                                  |                              | Difference (95%<br>CI)                       | Difference (95%<br>CI)            | Difference (95%<br>CI)     | Difference (95% CI)                        | Difference (95% CI)                  | Difference (95%<br>CI)            |
| <b>Midlife (51 – 70 years)</b>   |                              |                                              |                                   |                            |                                            |                                      |                                   |
| <i>Hearing threshold</i>         | <i>All frequencies</i>       | 0.01 (-0.06, 0.07)                           | -0.09 (-0.46, 0.28)               | -0.06 (-0.21, 0.09)        | 0.03 (-0.08, 0.14)                         | 0.01 (-0.05, 0.08)                   | 0.05 (-0.05, 0.16)                |
|                                  | <i>Speech frequencies</i>    | -0.01 (-0.07, 0.06)                          | -0.17 (-0.54, 0.19)               | -0.08 (-0.24, 0.08)        | -0.00 (-0.11, 0.11)                        | 0.01 (-0.06, 0.07)                   | 0.04 (-0.06, 0.15)                |
| <i>Speech understanding</i>      | <i>Signal-to-noise ratio</i> | 0.00 (-0.01, 0.01)                           | -0.01 (-0.08, 0.07)               | 0.00 (-0.03, 0.03)         | 0.01 (-0.02, 0.04)                         | 0.01 (-0.01, 0.03)                   | 0.00 (-0.01, 0.01)                |
| <b>Late-life (70 – 99 years)</b> |                              |                                              |                                   |                            |                                            |                                      |                                   |
| <i>Hearing threshold</i>         | <i>All frequencies</i>       | -0.05 (-0.11, 0.01)                          | 0.30 (-0.15, 0.75)                | 0.04 (-0.09, 0.18)         | 0.07 (-0.03, 0.17)                         | -0.02 (-0.08, 0.03)                  | 0.01 (-0.08, 0.09)                |
|                                  | <i>Speech frequencies</i>    | -0.06 (-0.12, 0.00)                          | 0.27 (-0.16, 0.70)                | 0.03 (-0.10, 0.16)         | 0.06 (-0.04, 0.15)                         | -0.03 (-0.08, 0.03)                  | -0.03 (-0.11, 0.06)               |
| <i>Speech understanding</i>      | <i>Signal-to-noise ratio</i> | -0.01 (-0.02, 0.00)                          | -0.03 (-0.15, 0.08)               | 0.00 (-0.03, 0.02)         | -0.01 (-0.03, 0.02)                        | 0.00 (-0.01, 0.01)                   | 0.00 (-0.01, 0.01)                |

Difference: represents the additional change in cognitive score per year increase in follow-up time per 10 dB increase in hearing threshold as measured with pure-tone audiometry or the additional difference in cognitive score per year increase in follow-up time per 1 dB increase in speech-reception threshold as measured with the digits-in-noise test. All frequencies is the average of: 0.25, 0.50, 1, 2, 4, and 8 kHz. Speech frequencies is the average of: 0.5, 1, 2, and 4 kHz. The amount of hearing loss is expressed in dB, i.e. a higher dB value reflects more hearing loss. CI: confidence interval. Adjusted for age, sex, education, alcohol consumption, smoking, diastolic and systolic blood pressure, use of blood pressure lowering medication, and for the interaction between age and follow-up time. Analyses with speech understanding were further adjusted for hearing thresholds as measured with pure-tone audiometry. Statistically significant effect estimates ( $p < 0.05$ ) are indicated in **bold**.

**Supplementary figure 1. Receiver operating curves illustrating the optimal cut-points for both mild hearing loss and moderate or greater hearing loss, as compared to normal hearing.**

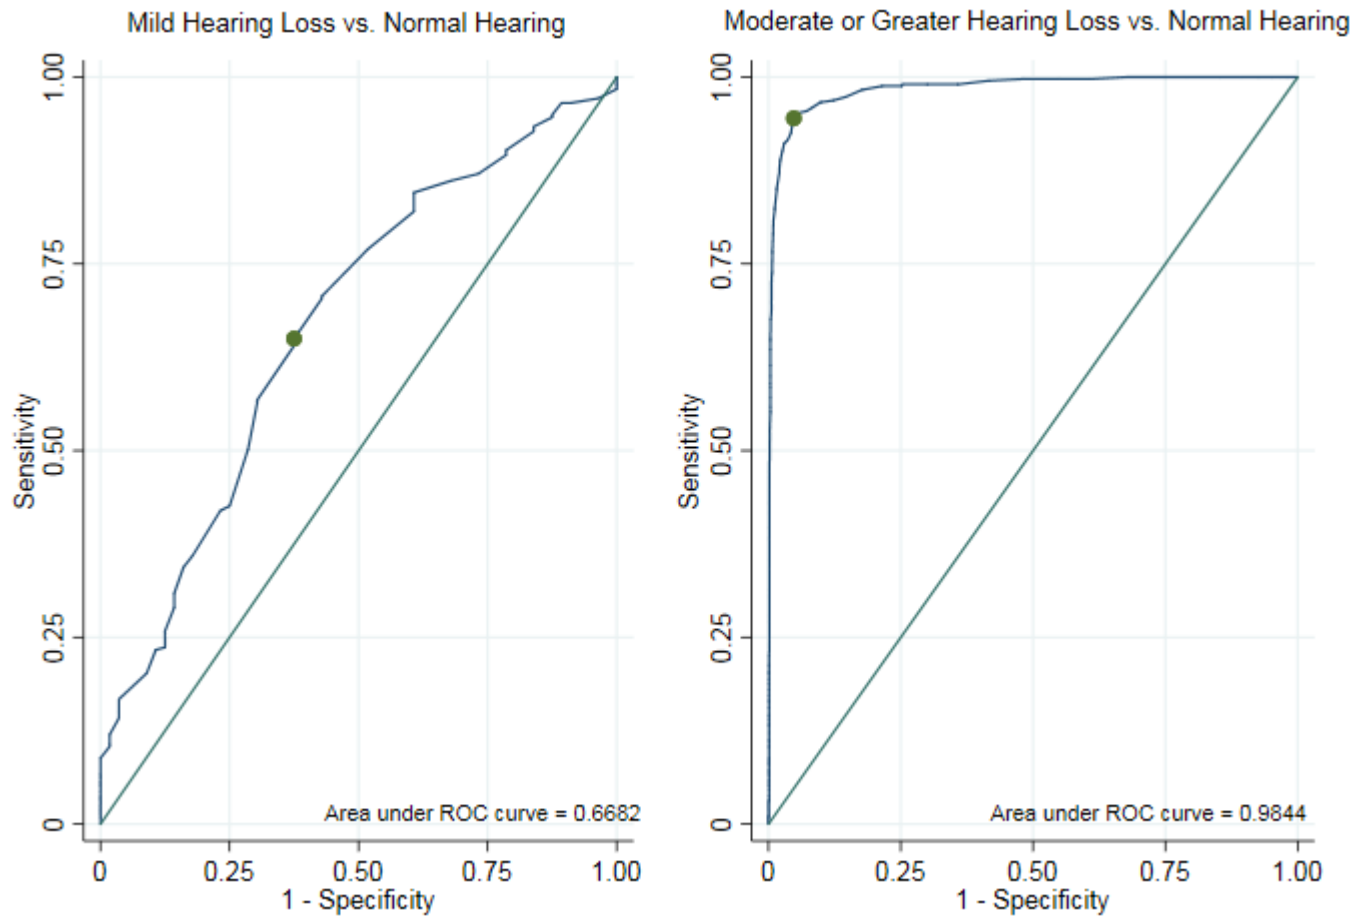

Receiver operating curves show the optimal cut-points for both mild hearing loss and moderate or greater hearing loss, based on pure-tone averages. The degrees of hearing loss defined by pure-tone average are: normal hearing (0 – 20 dB), mild hearing loss (20 – 35 dB), and moderate or greater hearing loss (>35 dB). This also shows the area under the ROC curve, a measure of how well the speech recognition levels from the Digits-In-Noise test can distinguish between the hearing groups.

Supplementary figure 2. Schematic overview of the Rotterdam Study.

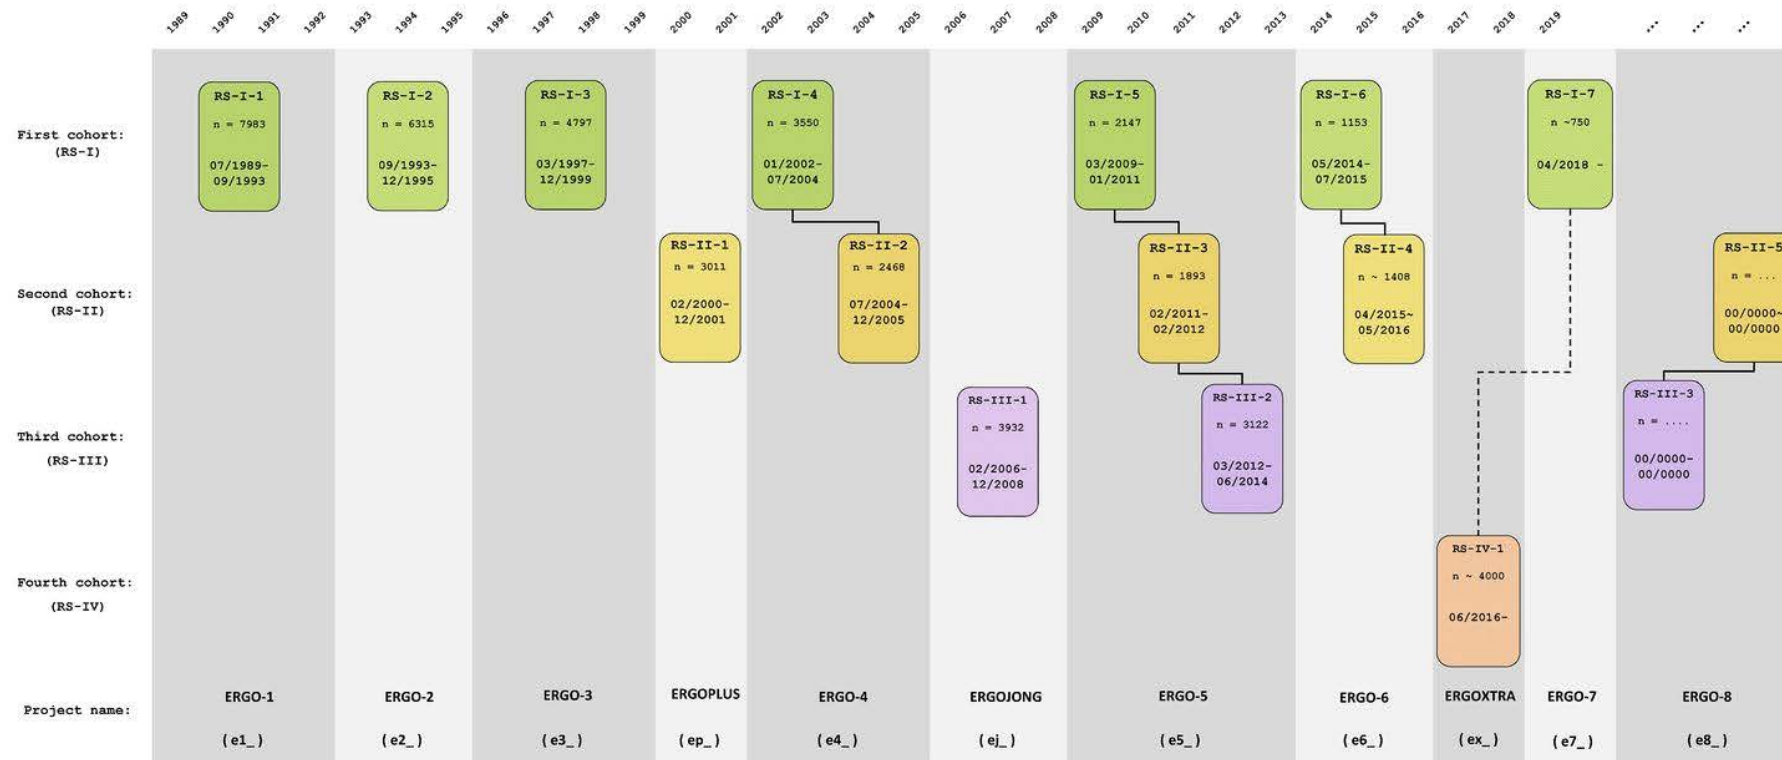

Supplementary figure 2 shows a schematic overview of the cohorts of the Rotterdam Study. Hearing assessment was added to the core study protocol in 2011; halfway through RS-I-5, at the start of RS-II-3 and RS-III-2. Data of RS-IV is under embargo and thus not available yet.
